**PS Form 3526 Statement of Ownership, Management, and Circulation (All Periodicals Publications Except Requester Publications)**

|                                                                                                                                                                                                                                                                                                                                                                                                                                                                                                                                                                         |  |                                                        |                                                               |                                           |
|-------------------------------------------------------------------------------------------------------------------------------------------------------------------------------------------------------------------------------------------------------------------------------------------------------------------------------------------------------------------------------------------------------------------------------------------------------------------------------------------------------------------------------------------------------------------------|--|--------------------------------------------------------|---------------------------------------------------------------|-------------------------------------------|
| 1. Publication Title<br>AMERICAN PSYCHIATRIC ASSOCIATION/<br>PSYCHIATRIC SERVICES                                                                                                                                                                                                                                                                                                                                                                                                                                                                                       |  | 2. Publication Number<br>251280                        | ISSN<br>10752730                                              | 3. Filing Date<br>09/28/2016              |
| 4. Issue Frequency<br>MONTHLY                                                                                                                                                                                                                                                                                                                                                                                                                                                                                                                                           |  | 5. Number of Issues Published Annually<br>12           |                                                               | 6. Annual Subscription Price<br>\$ 149.00 |
| 7. Complete Mailing Address of Known Office of Publication<br>1000 WILSON BLVD STE 1825<br>ARLINGTON, ARLINGTON, VA 22209-3924                                                                                                                                                                                                                                                                                                                                                                                                                                          |  |                                                        | Contact Person<br>ROGER DOMRAS<br>Telephone<br>(703) 907-8544 |                                           |
| 8. Complete Mailing Address of Headquarters or General Business Office of Publisher<br>1000 Wilson Blvd., Ste. 1825<br>Arlington, VA 22209-3924                                                                                                                                                                                                                                                                                                                                                                                                                         |  |                                                        |                                                               |                                           |
| 9. Full Names and Complete Mailing Addresses of Publisher, Editor, and Managing Editor                                                                                                                                                                                                                                                                                                                                                                                                                                                                                  |  |                                                        |                                                               |                                           |
| Publisher (Name and complete mailing address)<br>Rebecca Rinehart<br>1000 Wilson Blvd., Ste. 1825<br>Arlington, VA 22209-3924                                                                                                                                                                                                                                                                                                                                                                                                                                           |  |                                                        |                                                               |                                           |
| Editor (Name and complete mailing address)<br>Howard H. Goldman, M.D. PhD<br>1000 Wilson Blvd., Ste. 1825<br>Arlington, VA 22209-3924                                                                                                                                                                                                                                                                                                                                                                                                                                   |  |                                                        |                                                               |                                           |
| Managing Editor (Name and complete mailing address)<br>Constance Grant Gartner<br>1000 Wilson Blvd., Ste. 1825<br>Arlington, VA 22209-3924                                                                                                                                                                                                                                                                                                                                                                                                                              |  |                                                        |                                                               |                                           |
| 10. Owner (Do not leave blank. If the publication is owned by a corporation, give the name and address of the corporation immediately followed by the names and addresses of all stockholders owning or holding 1 percent or more of the total amount of stock. If not owned by a corporation, give names and addresses of the individual owners. If owned by a partnership or other unincorporated firm, give its name and address as well as those of each individual owner. If the publication is published by a nonprofit organization, give its name and address.) |  |                                                        |                                                               |                                           |
| Full Name                                                                                                                                                                                                                                                                                                                                                                                                                                                                                                                                                               |  | Complete Mailing Address                               |                                                               |                                           |
| American Psychiatric Assoc.                                                                                                                                                                                                                                                                                                                                                                                                                                                                                                                                             |  | 1000 Wilson Blvd., Ste. 1825, Arlington, VA 22209-3924 |                                                               |                                           |
| 11. Known Bondholders, Mortgagees, and Other Security Holders Owning or Holding 1 Percent or More of Total Amount of Bonds, Mortgages, or Other Securities. If none, check box <input checked="" type="checkbox"/> None                                                                                                                                                                                                                                                                                                                                                 |  |                                                        |                                                               |                                           |
| Full Name                                                                                                                                                                                                                                                                                                                                                                                                                                                                                                                                                               |  | Complete Mailing Address                               |                                                               |                                           |

PS Form 3526, September 2007 (Page 1)

PRIVACY NOTICE: See our privacy policy on [www.usps.com](http://www.usps.com)

**Psychiatric Services** (ISSN |1075-2730; online version, 1557-9700) is published monthly by the American Psychiatric Association, editorial and executive office, 1000 Wilson Blvd., Suite 1825, Arlington, VA 22209-3901. Copyright © 2016 by the American Psychiatric Association. Printed in U.S.A. Periodicals postage paid at Arlington, VA, and at additional mailing offices. POSTMASTER: Send address changes to **Psychiatric Services, 1000 Wilson Blvd., Suite 1825, Arlington, VA 22209-3901.**

|                                                                                              |                                                                                                                                                                    |                                                          |                                                             |
|----------------------------------------------------------------------------------------------|--------------------------------------------------------------------------------------------------------------------------------------------------------------------|----------------------------------------------------------|-------------------------------------------------------------|
| 13. Publication Title<br>AMERICAN PSYCHIATRIC ASSOCIATION/PSYCHIATRIC SERVICES               |                                                                                                                                                                    | 14. Issue Date for Circulation Data Below<br>09/01/2016  |                                                             |
| 15. Extend and Nature of Circulation                                                         |                                                                                                                                                                    | Average No. Copies Each Issue During Preceding 12 Months | No. Copies of Single Issue Published Nearest to Filing Date |
| a. Total Numbers of Copies (Net press run)                                                   |                                                                                                                                                                    | 870                                                      | 773                                                         |
| b. Paid Circulation (By Mail and Outside the Mail)                                           | (1) Mailed Outside County Paid Subscriptions Stated on PS Form 3541 (include paid distribution above nominal rate, advertiser's proof copies, and exchange copies) | 335                                                      | 308                                                         |
|                                                                                              | (2) Mailed In-County Paid Subscriptions Stated on PS Form 3541 (include paid distribution above nominal rate, advertiser's proof copies, and exchange copies)      | 0                                                        | 0                                                           |
|                                                                                              | (3) Paid Distribution Outside the Mails Including Sales Through Dealers and Carriers, Street Vendors, Counter Sales, and Other Paid Distribution Outside USPS      | 79                                                       | 83                                                          |
|                                                                                              | (4) Paid Distribution by Other Classes of Mail Through the USPS (e.g. First-Class Mail)                                                                            | 0                                                        | 0                                                           |
| c. Total Paid Distribution (Sum of 15b (1), (2), (3), (4))                                   |                                                                                                                                                                    | 414                                                      | 391                                                         |
| d. Free or Nominal Rate Distribution (By Mail and Outside the Mail)                          | (1) Free or Nominal Rate Outside County Copies included on PS Form 3541                                                                                            | 187                                                      | 191                                                         |
|                                                                                              | (2) Free or Nominal Rate In-County Copies included on PS Form 3541                                                                                                 | 0                                                        | 0                                                           |
|                                                                                              | (3) Free or Nominal Rate Copies Mailed at Other Classes Through the USPS (e.g. First-Class Mail)                                                                   | 0                                                        | 0                                                           |
|                                                                                              | (4) Free or Nominal Rate Distribution Outside the Mail (Carriers or other means)                                                                                   | 57                                                       | 57                                                          |
| e. Total Free or Nominal Rate Distribution (Sum of 15d (1), (2), (3), (4))                   |                                                                                                                                                                    | 244                                                      | 248                                                         |
| f. Total Distribution (Sum of 15c and 15e)                                                   |                                                                                                                                                                    | 658                                                      | 639                                                         |
| g. Copies not Distributed                                                                    |                                                                                                                                                                    | 0                                                        | 0                                                           |
| h. Total (Sum of 15f and 15g)                                                                |                                                                                                                                                                    | 658                                                      | 639                                                         |
| i. Percent Paid ((15c / 15f) times 100)                                                      |                                                                                                                                                                    | 62.92 %                                                  | 61.19 %                                                     |
| 16. If total circulation includes electronic copies, report that circulation on lines below. |                                                                                                                                                                    |                                                          |                                                             |
| a. Paid Electronic Copies                                                                    |                                                                                                                                                                    | 0                                                        | 0                                                           |
| b. Total Paid Print Copies (Line 15c) + Paid Electronic Copies                               |                                                                                                                                                                    | 0                                                        | 0                                                           |
| c. Total Print Distribution (Line 15f) + Paid Electronic Copies                              |                                                                                                                                                                    | 0                                                        | 0                                                           |
| d. Percent Paid (Both Print and Electronic Copies)                                           |                                                                                                                                                                    | 0.00 %                                                   | 0.00 %                                                      |

I certify that 50% of all my distributed copies (Electronic and Print) are paid above a nominal price.

17. Publication of Statement of Ownership

If the publication is a general publication, publication of this statement is required. Will be printed in the 11/01/2016 issue of this publication.  Publication not required.

|                                                                                               |                                             |                                |
|-----------------------------------------------------------------------------------------------|---------------------------------------------|--------------------------------|
| 18. Signature and Title of Editor, Publisher, Business Manager, or Owner<br>Peter Van Woerden | Title<br>Dir. Finance Publishing Operations | Date<br>09/28/2016 00:00:00 AM |
|-----------------------------------------------------------------------------------------------|---------------------------------------------|--------------------------------|

I certify that all information furnished on this form is true and complete. I understand that anyone who furnishes false or misleading information on this form or who omits material or information requested on the form may be subject to criminal sanctions (including fines and imprisonment) and/or civil sanctions (including civil penalties).

PS Form 3526, September 2007 (Page 2)

PRIVACY NOTICE: See our privacy policy on [www.usps.com](http://www.usps.com)

**Pocket Guide to Addiction Assessment and Treatment**

Edited by Petros Levounis, M.D., M.A.,  
Erin Zerbo, M.D., and Rashi Aggarwal, M.D.

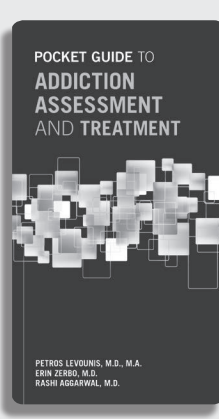

The *Pocket Guide to Addiction Assessment and Treatment* is designed specifically to aid a wide range of clinicians, regardless of their training in addiction, to more confidently assess and treat this patient population. With an accessible, easily referenced format, this book serves as a go-to resource for general psychiatrists other practitioners involved in the addiction treatment field. And because all of the diagnostic discussions are DSM-5®-based, readers can be confident that they're getting the most relevant and up-to-date guidance on the topic.

2016 • 379 pages • ISBN 978-1-58562-512-3 • Paperback \$65.00 • Item #62512

2016 • 379 pages • ISBN 978-1-58562-512-3 • eBook \$52.00 • Item #37072

AMERICAN PSYCHIATRIC ASSOCIATION PUBLISHING www.appi.org  
Email: [appi@psych.org](mailto:appi@psych.org)  
Phone: 1-800-368-5777

AH1639A

# New Psychotherapy Resources

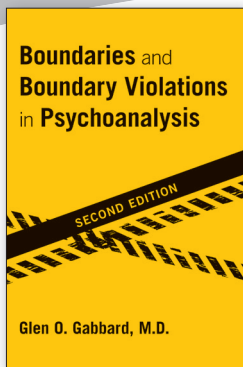

## Boundaries and Boundary Violations in Psychoanalysis, Second Edition

Glen O. Gabbard, M.D.

This new, thoroughly revised edition contains a wealth of new material, reflecting the current knowledge and evolving attitudes about boundary violations. The volume, which is based on the author's 30 years of experience evaluating, treating, and consulting on more than 300 cases of professional boundary violations, is essential reading for psychoanalysts, residents, training directors, therapists, and other mental health professionals.

2016 • 195 pages • ISBN 978-1-61537-017-7 • Paperback • \$69.00 • Item #37017  
2016 • 195 pages • ISBN 978-1-61537-071-9 • eBook • \$55.00 • Item #37071

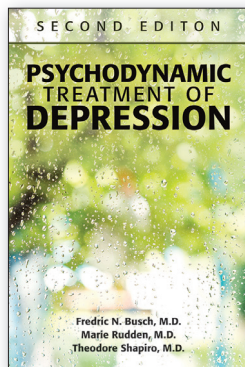

## Psychodynamic Treatment of Depression, Second Edition

Fredric N. Busch, M.D., Marie Rudden, M.D., and Theodore Shapiro, M.D.

The book's clear presentation of psychodynamic theories and their clinical applications promotes understanding for mental health professionals in diverse roles and practice settings. *Psychodynamic Treatment of Depression* offers current, concise, and comprehensive counsel for clinicians and trainees who seek to understand psychotherapeutic dynamics and hone their treatment skills.

2016 • 256 pages • ISBN 978-1-61537-035-1 • Paperback • \$65.00 • Item #37035  
2016 • 256 pages • ISBN 978-1-61537-069-6 • eBook • \$52.00 • Item #37069

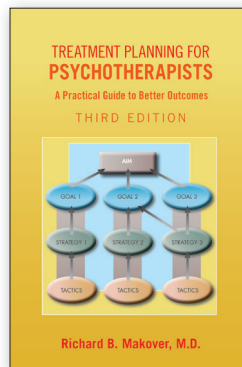

## Treatment Planning for Psychotherapists

*A Practical Guide to Better Outcomes, Third Edition*

Richard B. Makover, M.D.

This popular book offers a straightforward, practical method of organizing a treatment plan. It emphasizes a top-down, results-oriented approach that begins with the proposed outcome and then selects the objectives and methods to reach it. In this revised edition, Dr. Makover describes a new, simplified system that uses the initial assessment to formulate a case. The formulation then becomes the foundation of treatment decisions. Clinical cases offer clear examples of the planning process.

2016 • 268 pages • ISBN 978-1-61537-029-0 • Paperback • \$59.00 • Item #37029  
2016 • 268 pages • ISBN 978-1-61537-062-7 • eBook • \$47.00 • Item #37062

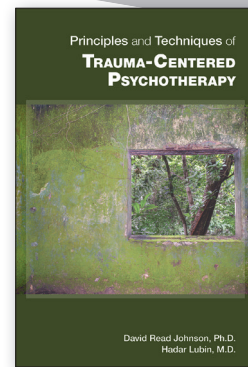

## Principles and Techniques of Trauma-Centered Psychotherapy

David Read Johnson, Ph.D., and Hadar Lubin, M.D.

From establishing the trauma treatment framework to navigating the inevitable disruptions to dealing with the negative effects on the therapist of hearing detailed accounts of traumatic events, *Principles and Techniques of Trauma-Centered Psychotherapy* is both pragmatic and empathic, providing effective strategies in the context of true life treatment.

2016 • 357 pages • ISBN 978-1-58562-514-7 • Paperback • \$62.00 • Item #62514  
2016 • 357 pages • ISBN 978-1-61537-021-4 • eBook • \$49.95 • Item #37021

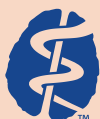

Source: http://ps.psychiatryonline.org/doi/suppl/10.1176/ps.2016.67.issue-12/suppl_file/back.pdf
