# Psychiatric Services

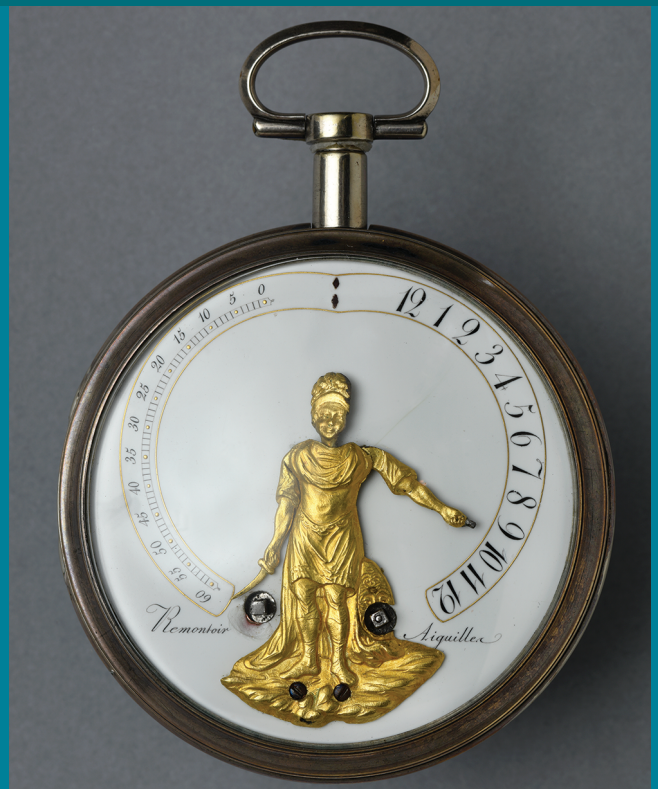

Psychiatrists' readiness for health care reform: survey findings

Antipsychotic prescribing patterns in the RAISE Connection Program

Integrating primary and mental health care in school-based health centers

The Connecticut Mental Health Center: a 50-year public-academic partnership
