# UNMATCHED GROWTH OPPORTUNITIES

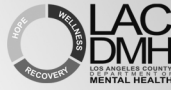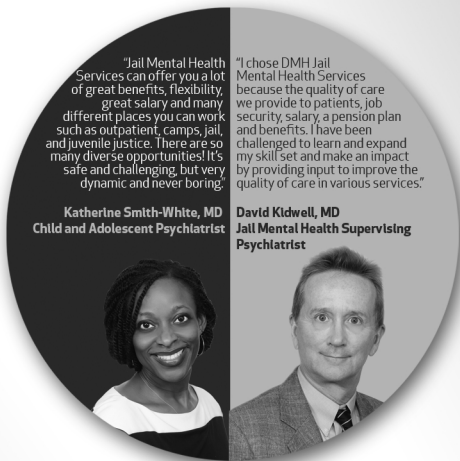

"Jail Mental Health Services can offer you a lot of great benefits, flexibility, great salary and many different places you can work such as outpatient, camps, jail, and juvenile justice. There are so many diverse opportunities! It's safe and challenging, but very dynamic and never boring."

**Katherine Smith-White, MD**  
Child and Adolescent Psychiatrist

"I chose DMH Jail Mental Health Services because the quality of care we provide to patients, job security, salary, a pension plan and benefits. I have been challenged to learn and expand my skill set and make an impact by providing input to improve the quality of care in various services."

**David Kidwell, MD**  
Jail Mental Health Supervising Psychiatrist

The Los Angeles County Department of Mental Health has immediate openings with Jail Mental Health Services, Juvenile Justice Correctional Facilities, Antelope Valley, and directly operated programs. This is your chance to join the leading mental health agency in the nation and work in a safe, diverse, and challenging environment. Our entire department is filled with opportunities for professional development and growth, and is expanding exponentially with 27 new full-time psychiatrist positions. We offer competitive salaries with potential bonuses up to \$30,000\* a year, depending on qualifications and placement, plus up to 24 hours a week is allowed for outside employment.

\*Based on CEO approval at step 15 of the mental health psychiatrist salary schedule.

[www.psychiatristjobs.la](http://www.psychiatristjobs.la)

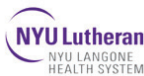

NYU Lutheran Family Health Center (NYU-LFHC), the FQHC outpatient component of the NYU Lutheran Psychiatry Service, is actively recruiting for multiple openings within our Behavioral Health Service Line. NYU-LFHC offers evidence based individualized treatment services for individuals managing mental health disorders, struggling with chemical dependency problems and/or coping with health issues associated with HIV/AIDS. Services are provided by multidisciplinary, multilingual, culturally competent treatment teams composed of physicians, nurses, psychologists, social workers and addiction counselors.

#### Recruitment is ongoing for the following openings:

1. Network Behavioral Health Medical Director. Strong background/interest in community mental health, provides overall psychiatric leadership for all ambulatory behavioral health services. Including supervision and direction of the delivery of clinical services by all licensed and credentialed behavioral health providers, any health professions students and trainees assigned.
2. Child and Adolescent Psychiatrist: Will serve as Associate Medical Director and be responsible for evaluation of patients, diagnosis of illness, overall treatment planning, implementation and follow-up of treatment, and disposition of psychiatric patients. Participates in development of clinical programs and supervision of clinical staff participating in such programs.
3. Adult Psychiatrists (3 positions): Responsible for evaluation of patients, diagnosis of illness, overall treatment planning, implementation and follow-up of treatment, and disposition of psychiatric patients, in the outpatient setting. Specialization in addiction treatment is preferred for one of the open positions.

Learn more about our program and apply for a position by sending your CV to: **W. Gordon Frankle, MD, MBA**, Chief, NYU Lutheran Psychiatry Service, and **Sean Pavlow**, Administrative Director, NYU Lutheran Psychiatry Service at [Sean.Pavlow@nyumc.org](mailto:Sean.Pavlow@nyumc.org)

# Understanding Mental Disorders

## Your Guide to DSM-5®

American Psychiatric Association

A consumer guide for anyone who has been touched by mental illness!

With Foreword by Patrick J. Kennedy

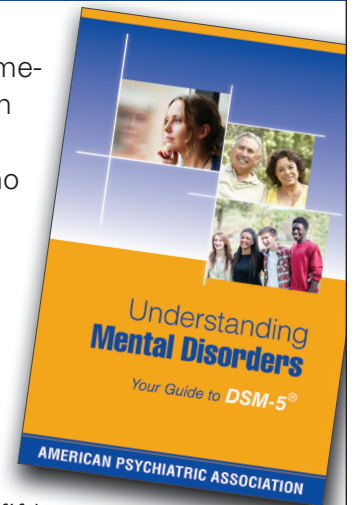

Most of us know someone who suffers from a mental illness. This book helps those who may be struggling with mental health problems, as well as those who want to help others achieve mental health and well-being.

Based on the latest, fifth edition of the *Diagnostic and Statistical Manual of Mental Disorders*—known as DSM-5®—**Understanding Mental Disorders** provides valuable insight on what to expect from an illness and its treatment—and will help readers recognize symptoms, know when to seek help, and get the right care. Featured disorders include depression, schizophrenia, ADHD, autism spectrum disorder, posttraumatic stress disorder, and bipolar disorder, among others.

2015 • 388 pages • ISBN 978-1-58562-491-1  
Paperback • \$24.95 • Item #62491

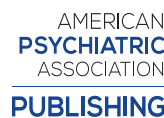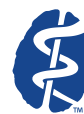

[www.appi.org](http://www.appi.org)

Phone: 703-907-7322

Toll Free: 1-800-368-5777

Email: [appi@psych.org](mailto:appi@psych.org)

20% Discount • American Psychiatric Association Members  
25% Discount • APA Resident-Fellow Members
